# Supplementary material for: Task-driven knowledge graph filtering improves prioritizing drugs for repurposing
Source: Springer Nature journal article supplement (doi:10.1186/s12859-022-04608-y), 2022-03-04
Supplement: MOESM1 [file 12859_2022_4608_MOESM1_ESM.pdf › 12859_2022_4608_MOESM1_ESM.pdf]

## Additional File 1

Table S1: Effects of Downsampling per Entity Type in Hetionet.

| Type             | Original | (%)   | Modified | (%)   | Change | (%)            |
|------------------|----------|-------|----------|-------|--------|----------------|
| Anatomy          | 400      | 0.88  | 394      | 2.03  | 6      | +129.70        |
| Biological Pr.   | 11381    | 25.20 | 1668     | 8.61  | 9713   | -65.82         |
| Cellular C.      | 1391     | 3.08  | 0        | 0.00  | 1391   | -100.          |
| <b>Compound</b>  | 1538     | 3.40  | 1503     | 7.76  | 35     | <b>+127.89</b> |
| <b>Disease</b>   | 136      | 0.30  | 136      | 0.70  | 0      | <b>+133.20</b> |
| Gene             | 19145    | 42.39 | 11291    | 58.30 | 7854   | +37.53         |
| Molecular F.     | 2884     | 6.38  | 932      | 4.81  | 1952   | -24.63         |
| Pathway          | 1822     | 4.03  | 959      | 4.95  | 863    | +22.74         |
| Pharmacologic C. | 345      | 0.76  | 252      | 1.30  | 93     | +70.34         |
| Side Effect      | 5701     | 12.62 | 1833     | 9.46  | 3868   | -25.01         |
| Symptom          | 415      | 0.91  | 396      | 2.04  | 19     | +122.52        |
| Total            | 45158    | 100   | 19364    | 100   |        | -              |

Table S2: Effects of Downsampling per Entity Type in DRKG.

| Type             | Original | (%)   | Modified | (%)   | Change | (%)           |
|------------------|----------|-------|----------|-------|--------|---------------|
| Anatomy          | 400      | 0.41  | 391      | 0.54  | 9      | +31.47        |
| Atc              | 4048     | 4.21  | 3262     | 4.56  | 786    | +8.38         |
| Biological Pr.   | 11381    | 11.80 | 6551     | 9.16  | 4830   | -22.58        |
| Cellular C.      | 1391     | 1.44  | 0        | 0.00  | 1391   | -100          |
| <b>Compound</b>  | 23347    | 24.28 | 19633    | 27.47 | 3714   | <b>+13.10</b> |
| <b>Disease</b>   | 4952     | 5.15  | 4813     | 6.73  | 139    | <b>+30.72</b> |
| Gene             | 39220    | 40.80 | 27380    | 38.31 | 11840  | -6.10         |
| Molecular F.     | 2884     | 3.00  | 2338     | 3.2   | 546    | +9.034        |
| Pathway          | 1822     | 1.89  | 1745     | 2.44  | 77     | +28.81        |
| Pharmacologic C. | 345      | 0.35  | 344      | 0.48  | 1      | +34.10        |
| Side Effect      | 5701     | 5.93  | 4619     | 6.46  | 1082   | +8.97         |
| Symptom          | 415      | 0.43  | 391      | 0.54  | 24     | +26.71        |
| Tax              | 215      | 0.22  | 0        | 0.00  | 215    | -100          |
| Total            | 96121    | 100   | 71467    | 100   |        | -             |

Table S3: Effects of Downsampling on the ranking of antiviral compounds against SARS CoV2-entities.

| Disease entity        | Favipiravir  |             |              | Danoprevir  |             |              | Lopinavir   |             |              | Ritonavir   |             |             |
|-----------------------|--------------|-------------|--------------|-------------|-------------|--------------|-------------|-------------|--------------|-------------|-------------|-------------|
|                       | Original     | Modified    | Change       | Original    | Modified    | Change       | Original    | Modified    | Change       | Original    | Modified    | Change      |
| SARS-CoV2E            | 8860         | 3904        | -4956        | 3016        | 3649        | +633         | 6641        | 1491        | -5150        | 1562        | 1304        | -258        |
| SARS-CoV2M            | 4220         | 8475        | 4255         | 5689        | 3363        | -2325        | 284         | 1363        | +1079        | 2568        | 1359        | -1209       |
| SARS-CoV2N            | 5265         | 4198        | -1067        | 5141        | 2385        | -2756        | 482         | 3183        | +2700        | 657         | 509         | -147        |
| <b>SARS-CoV2Spike</b> | <b>13145</b> | <b>4766</b> | <b>-8378</b> | <b>6799</b> | <b>3750</b> | <b>-3049</b> | <b>1835</b> | <b>1828</b> | <b>-7</b>    | <b>578</b>  | <b>1574</b> | <b>+996</b> |
| SARS-CoV2nsp1         | 4387         | 4961        | 573          | 3926        | 2365        | -1561        | 2474        | 1262        | -1212        | 2108        | 398         | -1710       |
| SARS-CoV2nsp10        | 3771         | 5260        | +1488        | 1259        | 2365        | +1105        | 418         | 697         | +279         | 316         | 806         | +490        |
| SARS-CoV2nsp11        | 5388         | 6192        | +803         | 3531        | 2548        | -983         | 4783        | 386         | -4397        | 2100        | 969         | -1131       |
| SARS-CoV2nsp12        | 10169        | 7406        | -2763        | 19394       | 2738        | -16656       | 1409        | 549         | -859         | 479         | 1948        | 1469        |
| SARS-CoV2nsp13        | 3760         | 4077        | +317         | 5925        | 4482        | -1442        | 808         | 2883        | +2075        | 693         | 2286        | +1593       |
| SARS-CoV2nsp14        | 12839        | 4893        | -7945        | 4609        | 1684        | -2925        | 2875        | 788         | -2087        | 72          | 1217        | +1145       |
| SARS-CoV2nsp15        | 6942         | 4363        | -2579        | 2491        | 1393        | -1098        | 685         | 485         | -199         | 166         | 189         | +23         |
| SARS-CoV2nsp2         | 9731         | 4454        | -5277        | 11542       | 2139        | -9403        | 259         | 1005        | +745         | 1889        | 336         | -1553       |
| SARS-CoV2nsp4         | 10764        | 6022        | -4742        | 2512        | 4323        | +1811        | 2936        | 2747        | -189         | 2783        | 753         | -2030       |
| SARS-CoV2nsp5         | 11219        | 4039        | -7179        | 2659        | 2892        | +232         | 1246        | 305         | -941         | 317         | 2052        | +1735       |
| SARS-CoV2nsp5 C145A   | 5458         | 5906        | +448         | 4392        | 3279        | -1113        | 1987        | 174         | -1813        | 239         | 457         | +217        |
| SARS-CoV2nsp6         | 3022         | 5108        | +2085        | 3398        | 3755        | +357         | 3382        | 560         | -2822        | 477         | 1176        | +699        |
| SARS-CoV2nsp7         | 6236         | 4405        | -1831        | 14625       | 3444        | -11181       | 6579        | 80          | -6499        | 254         | 865         | +611        |
| SARS-CoV2nsp8         | 5237         | 4266        | -971         | 3755        | 2580        | -1175        | 3552        | 1039        | -2513        | 2053        | 200         | -1852       |
| SARS-CoV2nsp9         | 8079         | 4978        | -3100        | 5432        | 2171        | -3260        | 2561        | 1561        | -1000        | 2718        | 199         | -2519       |
| SARS-CoV2orf10        | 6404         | 4524        | -1879        | 1200        | 3733        | +2533        | 735         | 1791        | +1056        | 1776        | 173         | -1603       |
| SARS-CoV2orf3a        | 3512         | 5467        | +1955        | 1798        | 2742        | +944         | 1829        | 540         | -1289        | 740         | 2291        | +1550       |
| SARS-CoV2orf3b        | 2867         | 5319        | +2452        | 2558        | 3159        | +600         | 642         | 342         | -299         | 608         | 850         | +242        |
| SARS-CoV2orf6         | 3823         | 4710        | +886         | 10305       | 2257        | -8048        | 642         | 652         | +10          | 3118        | 726         | -2392       |
| SARS-CoV2orf7a        | 9725         | 5961        | -3763        | 1425        | 2820        | +1394        | 3573        | 2072        | -1500        | 781         | 695         | -85         |
| SARS-CoV2orf8         | 4302         | 6508        | +2206        | 3032        | 1533        | -1499        | 286         | 2669        | +2383        | 1375        | 4430        | +3055       |
| SARS-CoV2orf9b        | 8684         | 6677        | -2006        | 2747        | 2012        | -734         | 116         | 1791        | +1674        | 1028        | 1319        | +291        |
| SARS-CoV2orf9c        | 4566         | 5980        | +1414        | 7251        | 4944        | -2307        | 10332       | 2753        | -7578        | 1318        | 2386        | +1068       |
| <b>Mean</b>           | <b>6754</b>  | <b>5289</b> | <b>-1465</b> | <b>5200</b> | <b>2907</b> | <b>-2292</b> | <b>2346</b> | <b>1296</b> | <b>-1050</b> | <b>1213</b> | <b>1165</b> | <b>-48</b>  |

Shown is the rank of a given SARS-CoV2 entity with a given antiviral compound when the model is trained on the full dataset versus when it is trained on the filtered dataset. The SARS-CoV2 entities are ranked against all remaining 19,633 compound entities by connecting them with a "treats" relation. Rank 1 means the highest probability that the two entities are connected by a "treats" relation, rank 19,633 means the lowest probability, rank 9,816 corresponds to the median probability.
